# Supplementary material for: FrpA is the outer membrane piscibactin transporter in Vibrio anguillarum: structural elements in synthetic piscibactin analogues required for transport
Source: PubMed Central journal article supplement (PMC8840927; doi:10.1007/s00775-021-01916-1), 2021-11-18
Supplement: 775_2021_1916_MOESM1_ESM.pdf [file 775_2021_1916_MOESM1_ESM.pdf]

## Supplementary Information

### **FrpA is the outer membrane piscibactin transporter in *Vibrio anguillarum*: structural elements in synthetic piscibactin analogues required for transport**

Marta A. Lages<sup>1</sup>, M. Carmen de la Fuente<sup>2</sup>, Lucía Ageitos<sup>2</sup>, Diana Martínez-Matamoros<sup>2</sup>, Jaime Rodríguez<sup>2\*</sup>, Miguel Balado<sup>1\*</sup>, Carlos Jiménez<sup>2\*</sup>, and Manuel L. Lemos<sup>1</sup>

<sup>1</sup>Departamento de Microbiología y Parasitología, Instituto de Acuicultura, Universidade de Santiago de Compostela, 15782 Santiago de Compostela, Spain

<sup>2</sup>Centro de Investigacións Científicas Avanzadas (CICA), Departamento de Química, Facultade de Ciencias, Universidade da Coruña, 15071 A Coruña, Spain

**Table S1: Strains and plasmids used in this work.**

| Strain                                                       | Relevant characteristics                                                                                  | Source                                    |
|--------------------------------------------------------------|-----------------------------------------------------------------------------------------------------------|-------------------------------------------|
| <b><i>V. anguillarum</i></b>                                 |                                                                                                           |                                           |
| MB14                                                         | RV22 with in-frame deletion of <i>vabF</i> gene<br>RV22 $\Delta vabF$                                     | Balado <i>et. al.</i> , 2006 <sup>1</sup> |
| MB67                                                         | RV22 with in-frame deletion of <i>vabD</i> gene<br>RV22 $\Delta vabD$                                     | Balado <i>et. al.</i> , 2008 <sup>2</sup> |
| ML208                                                        | RV22 with in-frame deletion of <i>vabF</i> and <i>frpA</i> genes<br>RV22 $\Delta vabF\Delta frpA$         | This study                                |
| ML210                                                        | RV22 with in-frame deletion of <i>vabD</i> and <i>frpA</i> genes<br>RV22 $\Delta vabD\Delta frpA$         | This study                                |
| <b><i>Photobacterium damsela</i> subsp. <i>piscicida</i></b> |                                                                                                           |                                           |
| DI21                                                         | Piscibactin producer strain                                                                               | Toranzo <i>et. al.</i> <sup>3</sup>       |
| <b><i>E. coli</i></b>                                        |                                                                                                           |                                           |
| DH5 $\alpha$                                                 | Cloning strain                                                                                            | Laboratory strain                         |
| S17-1-<br><i><math>\lambda</math>pir</i>                     | RP4 (Km::Tn7, Tc::Mu-1) <i>pro-82 <math>\lambda</math>pir recA1 end A1 thiE1</i><br><i>hsdR17 creC510</i> | Herrero <i>et. al.</i> <sup>4</sup>       |
| <b>Plasmids</b>                                              |                                                                                                           |                                           |
| pWKS30                                                       | Low-copy number cloning vector, Amp <sup>r</sup>                                                          | Wang and Kushner <sup>5</sup>             |
| pNidKan                                                      | Suicide vector derived from pCVD442, Kan <sup>r</sup>                                                     | Mouriño <i>et. al.</i> <sup>6</sup>       |
| pML257                                                       | S17 <i><math>\lambda</math>pir</i> pSEVA 651 <i>frpA</i> comp                                             | This study                                |

<sup>1</sup> Balado, M.; Osorio, C. R.; Lemos, M. L. A gene cluster involved in the biosynthesis of vanchrobactin, a chromosome-encoded siderophore produced by *Vibrio anguillarum*. *Microbiology* **2006**, *152*, 3517–3528. doi: 10.1099/mic.0.29298-0.

<sup>2</sup> Balado, M.; Osorio, C. R.; Lemos, M. L. Biosynthetic and regulatory elements involved in the production of the siderophore vanchrobactin in *Vibrio anguillarum*. *Microbiology* **2008**, *154*, 1400–1413. doi: 10.1099/mic.0.2008/016618-0.

<sup>3</sup> Toranzo, A. E.; Barreiro, S.; Casal, J. F.; Figueras, A.; Magariños, B.; Barja, J. L. Pasteurellosis in cultured gilthead seabream (*Sparus aurata*): first report in Spain. *Aquaculture* **1991**, *99*, 1–15. doi: 10.1016/0044-8486(91)90284-E.

<sup>4</sup> Herrero, M.; de Lorenzo, V.; and Timmis, K. N. Transposon vectors containing non-antibiotic resistance selection markers for cloning and stable chromosomal insertion of foreign genes in Gram-negative bacteria. *J. Bacteriol.* **1990**, *172*, 6557–6567. doi: 10.1128/jb.172.11.6557-6567.1990.

<sup>5</sup> Wang, R. F.; Kushner, S. R. Construction of versatile low-copy-number vectors for cloning, sequencing and gene expression in *Escherichia coli*. *Gene* **1991**, *100*, 195–199. doi: 10.1016/0378-1119(91)90366-J.

<sup>6</sup> Mourino, S.; Osorio, C. R.; Lemos, M. L. Characterization of heme uptake cluster genes in the fish pathogen *Vibrio anguillarum*. *J. Bacteriol.* **2004**, *186*, 6159–6167. doi: 10.1128/JB.186.18.6159-6167.2004

**Table S2: Oligonucleotides used for construction of *frpA*-defective mutants by allelic exchange and oligonucleotides complementation. Underlined sequences denote restriction sites.**

| Oligonucleotide                        | Sequence (5' → 3')            | Amplicon Size (bp) |
|----------------------------------------|-------------------------------|--------------------|
| <b><i>frpA</i> mutant construction</b> |                               |                    |
| 1_FrpAang_XbaI                         | CGCTCTAGAGGCAGCACTCAACAACAAGG | 750                |
| 2_FrpAang_BamHI                        | GCGGGATCCGAGTGCGAAAGCGGTTGAAG |                    |
| 3_FrpAang_BamHI                        | CCGGGATCCAACCTATTCGTTGCAATGC  | 750                |
| 4_FrpAang_4_XhoI                       | GCGCTCGAGGCTTTCAGAGATGGATGGTG |                    |
| <b><i>frpA</i> complementation</b>     |                               |                    |
| 1_FrpAang_comp_F_XbaI                  | CGCTCTAGACTCAGCGCAGAAATCTACAC | 2570               |
| 2_FrpAang_comp_R_BamHI                 | GGCGGATCCAGAGACGCCTTCTGAACGCA |                    |
